# Supplementary material for: Review of fragility analyses for major building types in Chinawith new implications for intensity-PGA relation development
Source: Copernicus journal article supplement (doi:10.5194/nhess-2019-195), 2019-08-08
Supplement: Supplementary file [file nhess-2019-195-RC2-supplement.pdf]

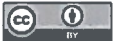

## References

### In English:

- Antoniou, S. and Pinho, R.: Development and verification of a displacement-based adaptive pushover procedure, *Journal of Earthquake Engineering*, 8, 643-661, <https://doi.org/10.1080/13632460409350504>, 2004.
- 5 Bilal, M. and Askan, A.: Relationships between Felt Intensity and Recorded Ground-Motion Parameters for Turkey, *B SEISMOL SOC AM*, 104, 484-496, <https://doi.org/10.1785/0120130093>, 2014.
- Billah, A. H. M. M. and Alam, M. S.: Seismic fragility assessment of highway bridges: A state-of-the-art review, *Structure and Infrastructure Engineering*, 11, 804-832, <https://doi.org/10.1080/15732479.2014.912243>, 2015.
- 4 Calvi, G. M., Pinho, R. and Magenes, G.: Development of seismic vulnerability assessment methodologies over the past 30 years, *ISET Journal of Earthquake Technology*, 43, 75-104, <https://www.researchgate.net/publication/241826044>, 2006.
- 10 Caprio, M., Tarigan, B. and Worden, C. B.: Ground motion to intensity conversion equations (GMICEs): A global relationship and evaluation of regional dependency, *Bulletin of the Seismological Society of America*, 105, 1476-1490, <https://doi.org/10.1785/0120140286>, 2015.
- 15 CSIS: China seismic intensity scale, a non-official English translation based on contents in Wikipedia, [https://en.wikipedia.org/w/index.php?title=China\\_seismic\\_intensity\\_scale&oldid=812457225](https://en.wikipedia.org/w/index.php?title=China_seismic_intensity_scale&oldid=812457225), last access: 21 May 2019.
- Crowley, H., Colombi, M., Silva, V., Ahmad N., Fardis M., Tsionis G., Papailia A., Taucer F., Hancilar U., Yakut A., Erberik M.A.: D3.1. Fragility functions for common RC building types in Europe, Pavia, Italy, 223 pp., <http://www.vce.at/SYNER-G/files/dissemination/deliverables.html>, 2011a.
- 20 Crowley, H., Colombi, M., Silva, V., Ahmad N., Fardis M., Tsionis G., Karatoni T., Lyrantazaki F., Taucer F., Hancilar U., Yakut A., Erberik M.A.: D3.2. Fragility functions for common masonry building types in Europe, Pavia, Italy, 177 pp., <http://www.vce.at/SYNER-G/files/dissemination/deliverables.html>, 2011b.
- Draper, N. R., Smith, H.: *Applied Regression Analysis*, 3<sup>rd</sup> ed., John Wiley & Sons, New York, United States, 2014.
- 25 Del Gaudio, C., Ricci, P. and Verderame, G. M.: Development and urban-scale application of a simplified method for seismic fragility assessment of RC buildings, *Engineering Structures*, 91, 40-57, <https://doi.org/10.1016/j.engstruct.2015.01.031>, 2015.
- Dumova-Jovanoska, E.: Fragility curves for reinforced concrete structures in Skopje (Macedonia) region, *Soil Dynamics and Earthquake Engineering*, 19, 455-466, [https://doi.org/10.1016/S0267-7261\(00\)00017-8](https://doi.org/10.1016/S0267-7261(00)00017-8), 2000.
- EMS1998: European Macro-seismic Scale 1998, European Seismological Commission, sub commission on Engineering Seismology, Working Group, Macro-seismic Scales, Conseil de l'Europe, Cahiers du Centre Européen de Géodynamique et de Séismologie, Vol. 15, Luxembourg, 1998.
- 1 Fajfar, P.: A nonlinear analysis method for performance-based seismic design, *Earthquake Spectra*, 16, 573-592, <https://doi.org/10.1193/1.1586128>, 2000.
- 35 FEMA: HAZUS<sup>®</sup>MH estimated annualized earthquake losses for the United States, FEMA 366, Washington DC, United States, <https://secure.madcad.com/media/fema/FEMA-366-2008.pdf>, 2008.
- FEMA: Multi-hazard loss estimation methodology: earthquake model (HAZUS-MH-MR3), Technical Report, Washington DC, USA, <https://www.fema.gov/media-library/assets/documents/24609>, 2003.
- 40 Freeman, S. A.: The capacity spectrum method, in *Proceedings of the 11th European Conference on Earthquake Engineering*, Paris, <http://citeseerx.ist.psu.edu/viewdoc/summary?doi=10.1.1.460.2405>, 1998.
- Freeman, S. A.: Review of the development of the capacity spectrum method, *ISET Journal of Earthquake Technology*, 41(1), 1-13, <http://citeseerx.ist.psu.edu/viewdoc/download?doi=10.1.1.451.9286>, 2004.
